# Supplementary material for: TXNDC5, a Newly Discovered Disulfide Isomerase with a Key Role in Cell Physiology and Pathology
Source: MDPI journal article supplement (doi:10.3390/ijms151223501), 2014-12-17
Supplement: s1 [file s1]

## Supplementary Information

**Table S1.** SNPs in *TXNDC5* gene coding region (synonymous, missense and nonsense) and SNPs present in *TXNDC5* non-coding regions, associated with pathologies [16].

| dbSNP Cluster ID | Function   | DbSNP Allele | Protein Residue | Codon Position | Amino Acid Position | Pathology |
|------------------|------------|--------------|-----------------|----------------|---------------------|-----------|
| rs377273518      | missense   | G → C        | V → L           | 1              | 122                 | N/A       |
| rs147681862      | missense   | A → G        | K → E           | 1              | 130                 | N/A       |
| rs71559189       | missense   | C → T        | H → Y           | 1              | 143                 | N/A       |
| rs139130947      | missense   | A → G        | R → G           | 1              | 148                 | N/A       |
| rs199964711      | missense   | G → C        | V → L           | 1              | 157                 | N/A       |
| rs141375323      | missense   | G → C        | V → L           | 1              | 178                 | N/A       |
| rs200044389      | missense   | A → G        | N → D           | 1              | 18                  | N/A       |
| rs45441296       | missense   | A → G        | M → V           | 1              | 182                 | N/A       |
| rs369704257      | missense   | G → A        | A → T           | 1              | 189                 | N/A       |
| rs147956330      | missense   | A → G        | K → E           | 1              | 210                 | N/A       |
| rs146368083      | missense   | T → G        | S → A           | 1              | 211                 | N/A       |
| rs142322001      | missense   | A → G        | N → D           | 1              | 212                 | N/A       |
| rs144589063      | nonsense   | T → C        | Stop codon → Q  | 1              | 23                  | N/A       |
| rs145581599      | missense   | T → C        | S → P           | 1              | 250                 | N/A       |
| rs2277106        | missense   | C → T        | L → F           | 1              | 260                 | N/A       |
| rs200329311      | missense   | A → G        | T → A           | 1              | 269                 | N/A       |
| rs374310716      | missense   | C → A        | H → N           | 1              | 278                 | N/A       |
| rs377761794      | nonsense   | T → C        | Stop codon → R  | 1              | 286                 | N/A       |
| rs201450918      | missense   | G → T        | V → L           | 1              | 292                 | N/A       |
| rs139736017      | missense   | A → C        | S → R           | 1              | 314                 | N/A       |
| rs139736017      | missense   | T → C        | C → R           | 1              | 314                 | N/A       |
| rs375213532      | synonymous | T → C        | L               | 1              | 317                 | N/A       |
| rs369648581      | missense   | G → A        | G → S           | 1              | 75                  | N/A       |
| rs375524173      | missense   | A → T        | T → S           | 1              | 87                  | N/A       |
| rs58711083       | missense   | A → G        | I → V           | 1              | 95                  | N/A       |

Table S1. *Cont.*

| dbSNP Cluster ID | Function    | DbSNP Allele | Protein Residue | Codon Position | Amino Acid Position | Pathology |
|------------------|-------------|--------------|-----------------|----------------|---------------------|-----------|
| rs144611399      | missense    | T → C        | V → A           | 2              | 123                 | N/A       |
| rs145246440      | missense    | T → A        | V → E           | 2              | 130                 | N/A       |
| rs34228534       | frame shift | C → -        | H → Q           | 2              | 150                 | N/A       |
| rs150804461      | missense    | A → G        | H → R           | 2              | 152                 | N/A       |
| rs137937387      | missense    | T → C        | M → T           | 2              | 194                 | N/A       |
| rs145305681      | missense    | T → C        | I → T           | 2              | 196                 | N/A       |
| rs149618625      | missense    | C → T        | A → V           | 2              | 197                 | N/A       |
| rs199530614      | missense    | T → G        | V → G           | 2              | 231                 | N/A       |
| rs147698471      | missense    | T → C        | L → P           | 2              | 240                 | N/A       |
| rs111331197      | missense    | A → G        | Q → G           | 2              | 295                 | N/A       |
| rs111331197      | missense    | C → G        | P → R           | 2              | 295                 | N/A       |
| rs137930317      | missense    | A → C        | N → T           | 2              | 30                  | N/A       |
| rs202149821      | missense    | G → A        | G → D           | 2              | 310                 | N/A       |
| rs146220191      | missense    | A → G        | H → R           | 2              | 314                 | N/A       |
| rs145133420      | missense    | C → A        | T → K           | 2              | 32                  | N/A       |
| rs141223042      | missense    | T → C        | V → A           | 2              | 320                 | N/A       |
| rs199917640      | missense    | A → G        | Q → R           | 2              | 47                  | N/A       |
| rs372609174      | missense    | T → C        | L → S           | 2              | 87                  | N/A       |
| rs183172271      | missense    | C → T        | P → L           | 2              | 93                  | N/A       |
| rs9502658        | synonymous  | T → C        | F               | 3              | 105                 | N/A       |
| rs145727157      | synonymous  | A → G        | P               | 3              | 107                 | N/A       |
| rs140867313      | synonymous  | T → C        | S               | 3              | 129                 | N/A       |
| rs145214714      | synonymous  | T → C        | S               | 3              | 17                  | N/A       |
| rs138364696      | synonymous  | T → C        | D               | 3              | 18                  | N/A       |
| rs145951032      | synonymous  | A → G        | S               | 3              | 184                 | N/A       |
| rs142347872      | synonymous  | A → G        | A               | 3              | 193                 | N/A       |
| rs150451942      | synonymous  | T → C        | P               | 3              | 199                 | N/A       |
| rs201328333      | synonymous  | A → G        | P               | 3              | 203                 | N/A       |

Table S1. *Cont.*

| dbSNP Cluster ID | Function   | DbSNP Allele | Protein Residue | Codon Position | Amino Acid Position | Pathology                                                      |
|------------------|------------|--------------|-----------------|----------------|---------------------|----------------------------------------------------------------|
| rs201328333      | synonymous | C → G        | P               | 3              | 203                 | N/A                                                            |
| rs140645336      | synonymous | T → C        | P               | 3              | 209                 | N/A                                                            |
| rs187873554      | synonymous | T → C        | S               | 3              | 21                  | N/A                                                            |
| rs145422768      | synonymous | G → A        | P               | 3              | 240                 | N/A                                                            |
| rs149716354      | synonymous | A → G        | E               | 3              | 253                 | N/A                                                            |
| rs2277105        | synonymous | A → G        | A               | 3              | 264                 | N/A                                                            |
| rs371329483      | synonymous | A → G        | S               | 3              | 284                 | N/A                                                            |
| rs369864303      | synonymous | A → G        | G               | 3              | 297                 | N/A                                                            |
| rs142360289      | synonymous | T → C        | V               | 3              | 300                 | N/A                                                            |
| rs9502656        | synonymous | T → C        | D               | 3              | 322                 | N/A                                                            |
| rs370405940      | synonymous | T → C        | A               | 3              | 4                   | N/A                                                            |
| rs200316196      | synonymous | T → C        | D               | 3              | 48                  | N/A                                                            |
| rs150394784      | synonymous | A → G        | P               | 3              | 69                  | N/A                                                            |
| rs151119008      | synonymous | A → G        | P               | 3              | 73                  | N/A                                                            |
| rs1043784        | N/A        | G → A        | N/A             | N/A            | 3' near gene        | Vitiligo [14]                                                  |
| rs1044104        | N/A        | T → C        | N/A             | N/A            | 3' near gene        | Arthritis [11]                                                 |
| rs41302895       | N/A        | A → T        | N/A             | N/A            | 3' near gene        | Arthritis [11]                                                 |
| rs7764128        | N/A        | A → G        | N/A             | N/A            | 3' near gene        | Vitiligo [14]                                                  |
| rs8643           | N/A        | G → A        | N/A             | N/A            | 3' near gene        | Vitiligo [14]                                                  |
| rs9505298        | N/A        | A → G        | N/A             | N/A            | 3' near gene        | Arthritis and cervical, esophageal and liver carcinomas [4,11] |
| rs13210097       | N/A        | A → C        | N/A             | N/A            | 5' near gene        | Cervical, esophageal and liver carcinomas [4]                  |
| rs3812162        | N/A        | A → C        | N/A             | N/A            | 5' near gene        | Arthritis [11]                                                 |
| rs1225936        | N/A        | C → A        | N/A             | N/A            | Intron              | Arthritis [11]                                                 |
| rs1225937        | N/A        | T → C        | N/A             | N/A            | Intron              | Arthritis [11]                                                 |
| rs1225938        | N/A        | G → A        | N/A             | N/A            | Intron              | Arthritis [11]                                                 |

Table S1. *Cont.*

| dbSNP Cluster ID | Function | DbSNP Allele | Protein Residue | Codon Position | Amino Acid Position | Pathology                                                                    |
|------------------|----------|--------------|-----------------|----------------|---------------------|------------------------------------------------------------------------------|
| rs1225943        | N/A      | A → C        | N/A             | N/A            | Intron              | Hepatocellular carcinoma, schizophrenia and vitiligo [3,13,14]               |
| rs1225944        | N/A      | C → T        | N/A             | N/A            | Intron              | Arthritis, hepatocellular carcinoma, schizophrenia and vitiligo [3,11,13,14] |
| rs1225945        | N/A      | T → C        | N/A             | N/A            | Intron              | Schizophrenia and vitiligo [13,14]                                           |
| rs1225947        | N/A      | G → T        | N/A             | N/A            | Intron              | Arthritis [11]                                                               |
| rs1225954        | N/A      | G → A        | N/A             | N/A            | Intron              | Arthritis [11]                                                               |
| rs1225955        | N/A      | G → A        | N/A             | N/A            | Intron              | Arthritis [11]                                                               |
| rs1225958        | N/A      | G → A        | N/A             | N/A            | Intron              | Schizophrenia and vitiligo [13,14]                                           |
| rs1238994        | N/A      | G → T        | N/A             | N/A            | Intron              | Arthritis [11]                                                               |
| rs13209404       | N/A      | C → T        | N/A             | N/A            | Intron              | Arthritis [11]                                                               |
| rs13873          | N/A      | G → T        | N/A             | N/A            | Intron              | Schizophrenia [13]                                                           |
| rs368074         | N/A      | C → G        | N/A             | N/A            | Intron              | Arthritis [11]                                                               |
| rs369086         | N/A      | G → A        | N/A             | N/A            | Intron              | Arthritis [11]                                                               |
| rs372578         | N/A      | A → G        | N/A             | N/A            | Intron              | Arthritis [11]                                                               |
| rs378963         | N/A      | T → C        | N/A             | N/A            | Intron              | Arthritis [11]                                                               |
| rs408014         | N/A      | G → A        | N/A             | N/A            | Intron              | Arthritis [11]                                                               |
| rs443861         | N/A      | G → A        | N/A             | N/A            | Intron              | Arthritis [11]                                                               |
| rs7771314        | N/A      | T → C        | N/A             | N/A            | Intron              | Cervical, esophageal and liver carcinomas [4]                                |
| rs89715          | N/A      | C → G        | N/A             | N/A            | Intron              | Arthritis [4]                                                                |

N/A, not applicable except for pathology section where it means non-available.
